# Supplementary material for: Amphipod family distributions around Iceland
Source: Zookeys. 2018 Jan 23;(731):1–53. doi: 10.3897/zookeys.731.19854 (PMC5806392; doi:10.3897/zookeys.731.19854)
Supplement: Supplementary material 1 — Table 1. Samples used for present study. [file zookeys-731-001-s003.xlsx]

## Sheet: Tabelle1
Station	866	867	868	869	870	871	872	879	880	967	979	1006	1010	1019	1033	1104	1119	1123	1155	1159	1168	1172	1181	1184	1194	Sum of all stations
Westwoodilla caecula	66	8	0	0	0	0	0	0	0	0	0	0	0	0	0	0	0	0	0	0	0	0	0	0	0	74
Westwoodilla megalops	0	2	0	0	0	0	0	0	0	0	0	0	0	0	0	0	0	0	0	0	0	0	0	0	0	2
Synchelidium haplocheles	15	59	15	0	0	0	0	0	0	0	0	0	0	0	0	0	0	0	0	0	0	0	0	0	0	89
Synchelidium intermedium	0	10	0	0	0	0	0	0	0	1	0	0	0	0	0	0	0	0	0	0	0	0	0	0	0	11
Monoculodes pallidus	15	29	0	0	0	0	0	0	0	0	0	0	0	0	1	1	0	0	0	0	0	0	0	0	0	46
Manoculodes falcatus	0	17	0	0	0	0	0	0	0	0	0	0	0	0	0	0	0	0	0	0	0	0	0	0	0	17
Monoculodes packardi	0	0	14	1	24	0	0	0	0	0	0	0	0	0	0	0	0	0	0	0	0	0	0	0	0	39
Monoculodes tenuirostratus	0	0	0	25	7	1	3	0	0	0	0	0	0	0	0	0	6	2	0	15	1	6	6	0	0	72
Monoculodes kroyeri	0	0	0	0	0	0	0	2	0	0	0	0	0	0	0	0	0	0	0	0	0	0	0	0	0	2
Monoculodes norwegicus	0	0	0	0	0	0	0	0	0	0	0	0	0	0	0	0	1	0	0	0	0	0	0	0	0	1
Paroediceros lynceus	0	0	1	0	0	0	0	0	0	0	0	0	0	0	0	0	2	0	0	0	0	0	0	0	0	3
Paroediceros propinquus	0	0	0	0	15	1	1	1	35	0	0	0	0	0	0	0	0	0	0	0	0	0	3	0	4	60
Paroediceros curvirostris	0	0	0	0	110	0	3	0	0	0	0	0	0	0	0	0	0	0	2	13	7	37	16	14	15	217
Arrhis phyllonyx	0	0	0	0	42	0	0	4	1	0	0	0	0	0	0	0	5	0	0	8	3	10	0	0	1	74
Oediceropsis brevicornis	0	0	0	0	0	0	0	0	0	0	3	0	0	0	0	0	0	0	0	0	0	0	0	0	0	3
Oediceropsis sp.2	0	0	0	0	0	0	0	0	0	0	0	0	0	2	0	0	0	0	0	0	0	0	0	0	0	2
Bathymedon longimanus	0	0	0	0	0	0	0	0	0	0	0	1	0	0	0	0	0	0	0	0	0	0	0	0	0	1
Bathymedon saussurei	0	0	0	0	0	0	0	0	0	0	0	0	0	0	0	0	4	0	0	0	0	0	0	0	0	4
Bathymedon sp.3	0	0	0	0	0	0	0	0	0	0	0	0	2	3	0	0	0	0	0	0	0	0	0	0	0	5
Oediceros borealis	0	0	0	0	0	0	0	0	0	0	0	0	0	0	0	0	1	0	0	0	0	0	0	0	0	1
Oedricerina	0	0	0	0	0	0	0	0	0	0	0	0	0	0	0	0	0	0	0	2	1	2	0	0	0	5
Total	96	125	30	26	198	2	7	7	36	1	3	1	2	5	1	1	19	2	2	38	12	55	25	14	20	728
